# Supplementary material for: The role of the essential GTPase ObgE in regulating lipopolysaccharide synthesis in Escherichia coli
Source: PubMed Central journal article supplement — Nat Commun. 2024 Nov 8;15:9684. doi: 10.1038/s41467-024-53980-1 (PMC11549432; doi:10.1038/s41467-024-53980-1), 2024-11-08
Supplement: 41467_2024_53980_MOESM11_ESM.pdf [file 41467_2024_53980_MOESM11_ESM.pdf]

## Reporting Summary

Nature Portfolio wishes to improve the reproducibility of the work that we publish. This form provides structure for consistency and transparency in reporting. For further information on Nature Portfolio policies, see our [Editorial Policies](#) and the [Editorial Policy Checklist](#).

### Statistics

For all statistical analyses, confirm that the following items are present in the figure legend, table legend, main text, or Methods section.

n/a Confirmed

- |                                     |                                     |                                                                                                                                                                                                                                                            |
|-------------------------------------|-------------------------------------|------------------------------------------------------------------------------------------------------------------------------------------------------------------------------------------------------------------------------------------------------------|
| <input type="checkbox"/>            | <input checked="" type="checkbox"/> | The exact sample size ( $n$ ) for each experimental group/condition, given as a discrete number and unit of measurement                                                                                                                                    |
| <input type="checkbox"/>            | <input checked="" type="checkbox"/> | A statement on whether measurements were taken from distinct samples or whether the same sample was measured repeatedly                                                                                                                                    |
| <input type="checkbox"/>            | <input checked="" type="checkbox"/> | The statistical test(s) used AND whether they are one- or two-sided<br><i>Only common tests should be described solely by name; describe more complex techniques in the Methods section.</i>                                                               |
| <input checked="" type="checkbox"/> | <input type="checkbox"/>            | A description of all covariates tested                                                                                                                                                                                                                     |
| <input type="checkbox"/>            | <input checked="" type="checkbox"/> | A description of any assumptions or corrections, such as tests of normality and adjustment for multiple comparisons                                                                                                                                        |
| <input type="checkbox"/>            | <input checked="" type="checkbox"/> | A full description of the statistical parameters including central tendency (e.g. means) or other basic estimates (e.g. regression coefficient) AND variation (e.g. standard deviation) or associated estimates of uncertainty (e.g. confidence intervals) |
| <input type="checkbox"/>            | <input checked="" type="checkbox"/> | For null hypothesis testing, the test statistic (e.g. $F$ , $t$ , $r$ ) with confidence intervals, effect sizes, degrees of freedom and $P$ value noted<br><i>Give <math>P</math> values as exact values whenever suitable.</i>                            |
| <input checked="" type="checkbox"/> | <input type="checkbox"/>            | For Bayesian analysis, information on the choice of priors and Markov chain Monte Carlo settings                                                                                                                                                           |
| <input checked="" type="checkbox"/> | <input type="checkbox"/>            | For hierarchical and complex designs, identification of the appropriate level for tests and full reporting of outcomes                                                                                                                                     |
| <input checked="" type="checkbox"/> | <input type="checkbox"/>            | Estimates of effect sizes (e.g. Cohen's $d$ , Pearson's $r$ ), indicating how they were calculated                                                                                                                                                         |

*Our web collection on [statistics for biologists](#) contains articles on many of the points above.*

### Software and code

Policy information about [availability of computer code](#)

Data collection The following software was used for data collection: CytExpert 2.4, VisionCapt v16.08g, Tecan i-control 2.0.10.0, FlexControl 3.4

Data analysis The following software/code was used for data analysis: Galaxy suite (Trimmomatic Galaxy Version 0.36.6, FastQC Galaxy Version 0.72+galaxy1, Bowtie2 Galaxy Version 2.4.2+galaxy0, Qualimap BamQC Galaxy Version 2.2.2c+galaxy1, htseq-count Galaxy Version 0.9.1+galaxy1), R 4.2.0, DESeq2 1.38.3, CytExpert 2.4, PyMol 2.5.2 and 2.5.7, STRINGdbR 2.10.1, MicrobeJ 5.13o, GraphPad Prism 8-10, FlexAnalysis 3.4, BioPharma Compass 4.0.1, MASCOT server 2.8.2. Code for analysis of our CRISPRi screening data was custom made and has been deposited on Zenodo as record 13902656 with DOI <https://doi.org/10.5281/zenodo.13902656>.

For manuscripts utilizing custom algorithms or software that are central to the research but not yet described in published literature, software must be made available to editors and reviewers. We strongly encourage code deposition in a community repository (e.g. GitHub). See the Nature Portfolio [guidelines for submitting code & software](#) for further information.

### Data

Policy information about [availability of data](#)

All manuscripts must include a [data availability statement](#). This statement should provide the following information, where applicable:

- Accession codes, unique identifiers, or web links for publicly available datasets
- A description of any restrictions on data availability
- For clinical datasets or third party data, please ensure that the statement adheres to our [policy](#)

All raw data included in this manuscript are available. The sequencing data generated in this study have been deposited in the Sequence Read Archive (SRA) with

BioProject accession number PRJNA1061367 (<https://www.ncbi.nlm.nih.gov/bioproject/PRJNA1061367>), microscopy images and videos have been deposited on the EMBL-EBI Biolmages Archive with accession number S-BIAD1002 (<https://www.ebi.ac.uk/biostudies/Biolmages/studies/S-BIAD1002>). The output of AlphaFold-Multimer and all other data presented here (including raw gel images and MS data) are deposited on Zenodo as record 13902471 with DOI <https://doi.org/10.5281/zenodo.13902471>.

## Research involving human participants, their data, or biological material

Policy information about studies with [human participants or human data](#). See also policy information about [sex, gender \(identity/presentation\), and sexual orientation](#) and [race, ethnicity and racism](#).

|                                                                    |    |
|--------------------------------------------------------------------|----|
| Reporting on sex and gender                                        | NA |
| Reporting on race, ethnicity, or other socially relevant groupings | NA |
| Population characteristics                                         | NA |
| Recruitment                                                        | NA |
| Ethics oversight                                                   | NA |

Note that full information on the approval of the study protocol must also be provided in the manuscript.

## Field-specific reporting

Please select the one below that is the best fit for your research. If you are not sure, read the appropriate sections before making your selection.

Life sciences  Behavioural & social sciences  Ecological, evolutionary & environmental sciences

For a reference copy of the document with all sections, see [nature.com/documents/nr-reporting-summary-flat.pdf](https://www.nature.com/documents/nr-reporting-summary-flat.pdf)

## Life sciences study design

All studies must disclose on these points even when the disclosure is negative.

|                 |                                                                                                                                                                                                                                       |
|-----------------|---------------------------------------------------------------------------------------------------------------------------------------------------------------------------------------------------------------------------------------|
| Sample size     | For all assays, we collected at least three completely independent biological repeats. One exception are the LpxA activity assays where limiting amounts of substrates prevented us from performing three repeats for all conditions. |
| Data exclusions | No data were excluded from the analyses.                                                                                                                                                                                              |
| Replication     | All experiments were repeated and all repeats are included in our manuscript, highlighting the reproducibility of our findings.                                                                                                       |
| Randomization   | NA, no experimental groups were constructed for this study.                                                                                                                                                                           |
| Blinding        | Investigators were not blinded for this study due to practicality issues.                                                                                                                                                             |

## Reporting for specific materials, systems and methods

We require information from authors about some types of materials, experimental systems and methods used in many studies. Here, indicate whether each material, system or method listed is relevant to your study. If you are not sure if a list item applies to your research, read the appropriate section before selecting a response.

### Materials & experimental systems

| n/a                                 | Involved in the study                                  |
|-------------------------------------|--------------------------------------------------------|
| <input checked="" type="checkbox"/> | <input type="checkbox"/> Antibodies                    |
| <input checked="" type="checkbox"/> | <input type="checkbox"/> Eukaryotic cell lines         |
| <input checked="" type="checkbox"/> | <input type="checkbox"/> Palaeontology and archaeology |
| <input checked="" type="checkbox"/> | <input type="checkbox"/> Animals and other organisms   |
| <input checked="" type="checkbox"/> | <input type="checkbox"/> Clinical data                 |
| <input checked="" type="checkbox"/> | <input type="checkbox"/> Dual use research of concern  |
| <input checked="" type="checkbox"/> | <input type="checkbox"/> Plants                        |

### Methods

| n/a                                 | Involved in the study                              |
|-------------------------------------|----------------------------------------------------|
| <input checked="" type="checkbox"/> | <input type="checkbox"/> ChIP-seq                  |
| <input type="checkbox"/>            | <input checked="" type="checkbox"/> Flow cytometry |
| <input checked="" type="checkbox"/> | <input type="checkbox"/> MRI-based neuroimaging    |

## Plants

|                       |    |
|-----------------------|----|
| Seed stocks           | NA |
| Novel plant genotypes | NA |
| Authentication        | NA |

## Flow Cytometry

### Plots

Confirm that:

- The axis labels state the marker and fluorochrome used (e.g. CD4-FITC).
- The axis scales are clearly visible. Include numbers along axes only for bottom left plot of group (a 'group' is an analysis of identical markers).
- All plots are contour plots with outliers or pseudocolor plots.
- A numerical value for number of cells or percentage (with statistics) is provided.

### Methodology

|                           |                                                                                                                                                                                                                  |
|---------------------------|------------------------------------------------------------------------------------------------------------------------------------------------------------------------------------------------------------------|
| Sample preparation        | Cultures were grown overnight, diluted 100x in selective LB medium, grown for 2h, induced with 0.2% w/v arabinose and incubated for 2h. Cultures were then diluted 1000x in PBS and subjected to flow cytometry. |
| Instrument                | CytoFLEX S (Beckman Coulter Life Sciences) equipped with 405 nm, 488 nm and 561 nm lasers.                                                                                                                       |
| Software                  | CytExpert 2.4                                                                                                                                                                                                    |
| Cell population abundance | NA, no populations were recorded.                                                                                                                                                                                |
| Gating strategy           | NA, no gating was performed.                                                                                                                                                                                     |

- Tick this box to confirm that a figure exemplifying the gating strategy is provided in the Supplementary Information.
